# Supplementary material
Source: Springer Nature journal article supplement (https://www.springermedizin.de/resource/supplementary/13550_2013_152_MOESM7_ESM.pdf/9687698)

### Control System

### Synthesis Module

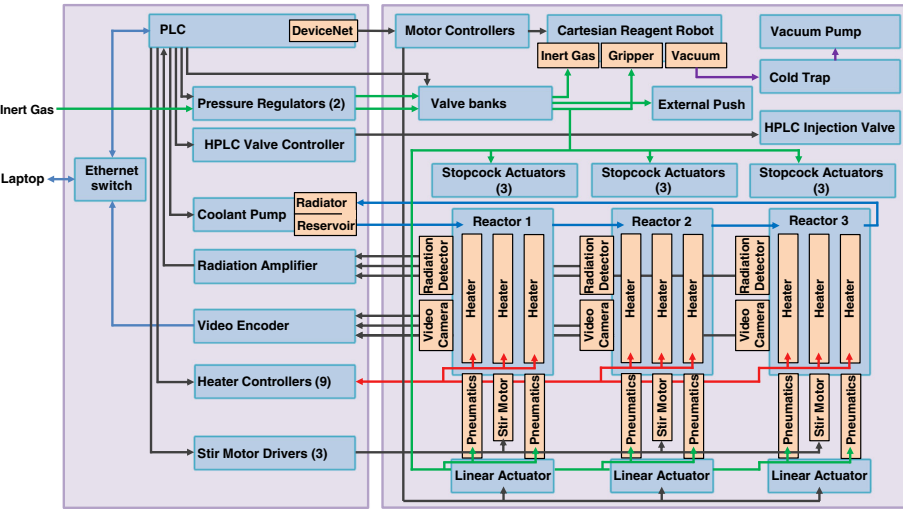

Supplement: MOESM7 [file 9687698]
